# Supplementary material
Source: Springer Nature journal article supplement (https://www.springermedizin.de/resource/supplementary/12936_2012_2155_MOESM2_ESM.pdf/9542752)
Supplement: MOESM2 [file 9542752]

## Additional File 2. Primer sequences for site-directed mutagenesis of PkNBPXb-II

| Gene       | Cysteine                              | Primer Sequence                                                          |
|------------|---------------------------------------|--------------------------------------------------------------------------|
| pknbpxb-II | First Cysteine                        | MPC1: 5' GGATTATGTT <u>G</u> GTGTCATGAATAATGATGATAATATAATTTCTTTATTCCG 3' |
|            | Second Cysteine                       | MPC2: 5' TCGGAGTATGAAGGA <u>A</u> GCTCCAATCAGACTTCTG 3'                  |
|            | Third Cysteine                        | MPC3: 5' GTATTTTACATGA <u>A</u> GCGATGAAAAGAAATTATAACAAACATAAAGAGG 3'    |
|            | Fourth Cysteine                       | MPC4: 5' ATAGATCATATGGAT <u>G</u> GCGACTGGACTAACTACTGTCC 3'              |
|            | Fifth Cysteine                        | MPC5: 5' TGCAGCTGGACTAACTAC <u>G</u> GTCCAACAGGTACATATTAC 3'             |
|            | Second Cysteine<br>Reversion Mutation | MPCR2: 5' TCGGAGTATGAAGGA <u>A</u> TGCTCCAATCAGACTTCTG 3'                |
|            | Third Cysteine<br>Reversion Mutation  | MPCR3: 5' GTATTTTACATGA <u>A</u> TGCATGAAAAGAAATTATAACAAACATAAAGAGG 3'   |
|            | Fourth Cysteine<br>Reversion Mutation | MPCR4: 5' ATAGATCATATGGAT <u>I</u> GCGACTGGACTAACTACTGTCC 3'             |
|            | Fifth Cysteine<br>Reversion Mutation  | MPCR5: 5' TGCAGCTGGACTAACTAC <u>I</u> GTCCAACAGGTACATATTAC 3'            |
